# Supplementary material for: Intrinsically stretchable photonic synaptic transistors for retina-like visual image systems
Source: Royal Society of Chemistry journal article supplement (doi:10.1039/d2tc01775j), 2022-01-01
Supplement: d2tc01775j1.pdf [file d2tc01775j1.pdf]

## Supporting Information

### Intrinsically stretchable photonic synaptic transistors for retina-like visual image systems

*Fan Xu, Cong Zhang, Xiaoli Zhao\*, Hongyan Yu, Guodong Zhao, Juntong Li, Bin Wang, Yanhong Tong, Qingxin Tang\*, and Yichun Liu*

Center for Advanced Optoelectronic Functional Materials Research, and Key Lab of UV-Emitting Materials and Technology of Ministry of Education, Northeast Normal University, 5268 Renmin Street, Changchun 130024, China.

E-mail: tangqx@nenu.edu.cn; zhaoxl326@nenu.edu.cn

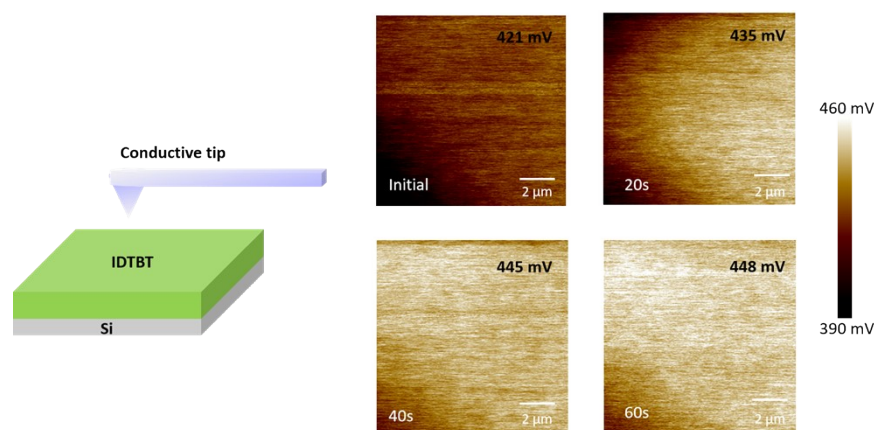

**Figure S1.** Schematic diagram of IDTBT surface potential measurement process and surface potential of the IDTBT film under 670 nm illumination for different irradiation time by KPFM mode (scale bar, 2 μm).

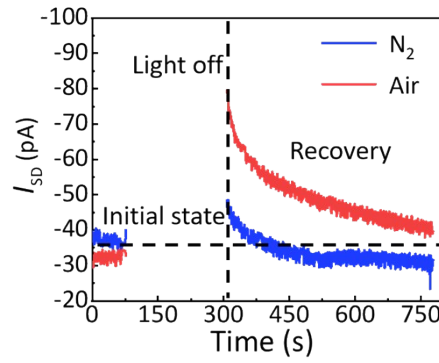

**Figure S2.**  $I_{SD} - t$  curves of IDTBT photonic synaptic transistor measured with  $V_{SD} = -5$  V and  $V_G = 0$  V in nitrogen and in air, respectively.

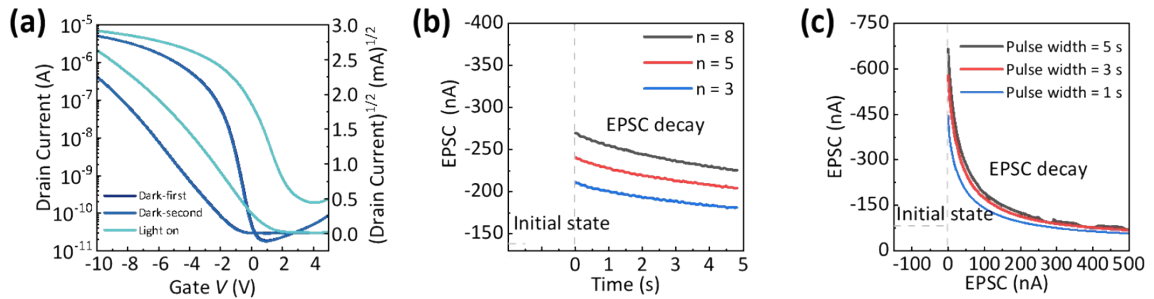

**Figure S3.** (a) Transfer characteristics curves of the IDTBT OFET. Stability and photo responsivity. (670 nm, 0.53 mW/cm<sup>2</sup>, irradiation time: 60 s) (b) The detailed decay time of the excitatory postsynaptic current (EPSC) with the different pulse numbers and (c) widths.

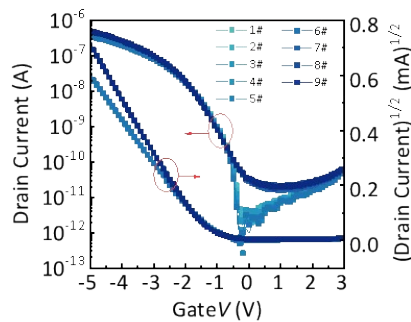

**Figure S4.** Transfer characteristics curves of every pixel in 3×3 IDTBT transistor array.

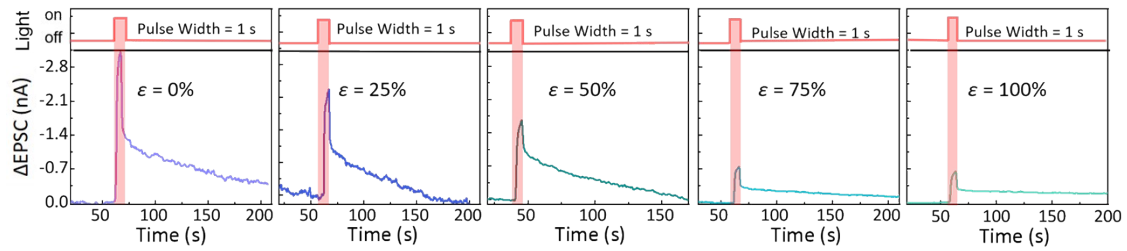

**Figure S5.** Single light pulse under 670 nm excitation induced EPSC upon IDTBT film under different levels of mechanical strain (pulse width: 1 s, light intensity: 0.53 mW/cm<sup>2</sup>)

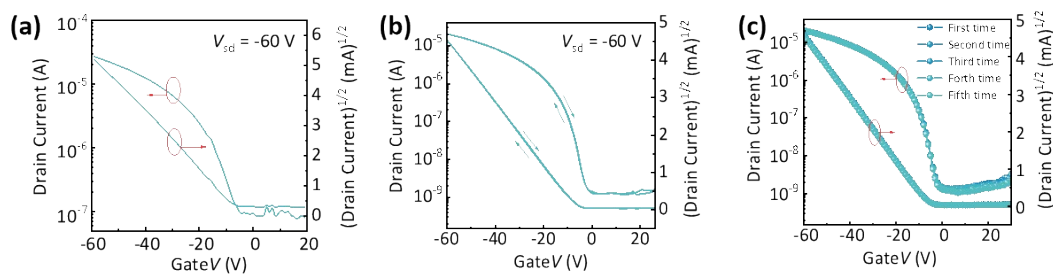

**Figure S6.** (a) Transfer characteristics curves of stretchable IDTBT transistor. (b) Dual sweep transfer characteristics of stretchable IDTBT transistor with zero hysteresis. (c) Operation stability of the stretchable IDTBT transistor.

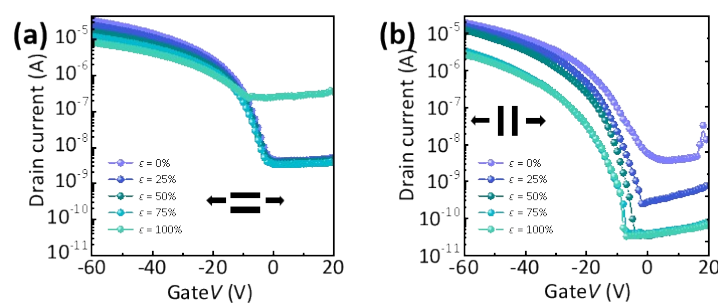

**Figure S7.** (a,b) Transfer characteristics curves of stretchable IDTBT transistor upon stretched (0%, 25%, 50%, 75%, 100%) perpendicular and along to the channel length direction, respectively.

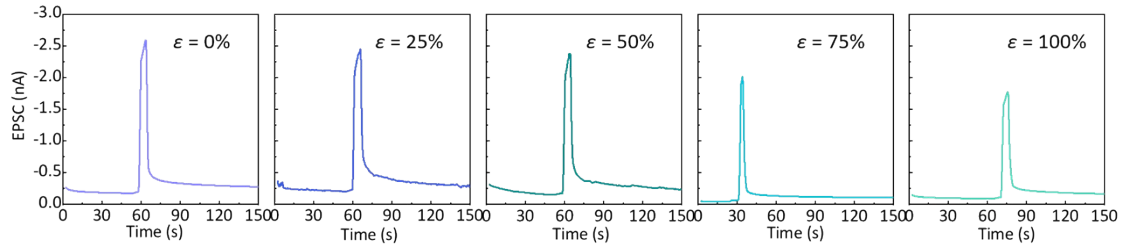

**Figure S8.** Single light pulse (pulse width: 3 s) induced EPSC of stretchable photonic synaptic transistor upon different strain deformation.

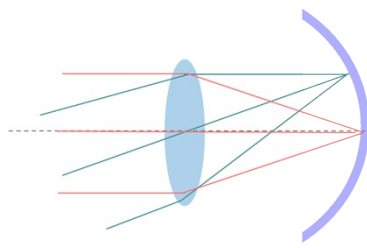

**Figure S9.** The light focusing effect comparison of the human retina and flat sensors.

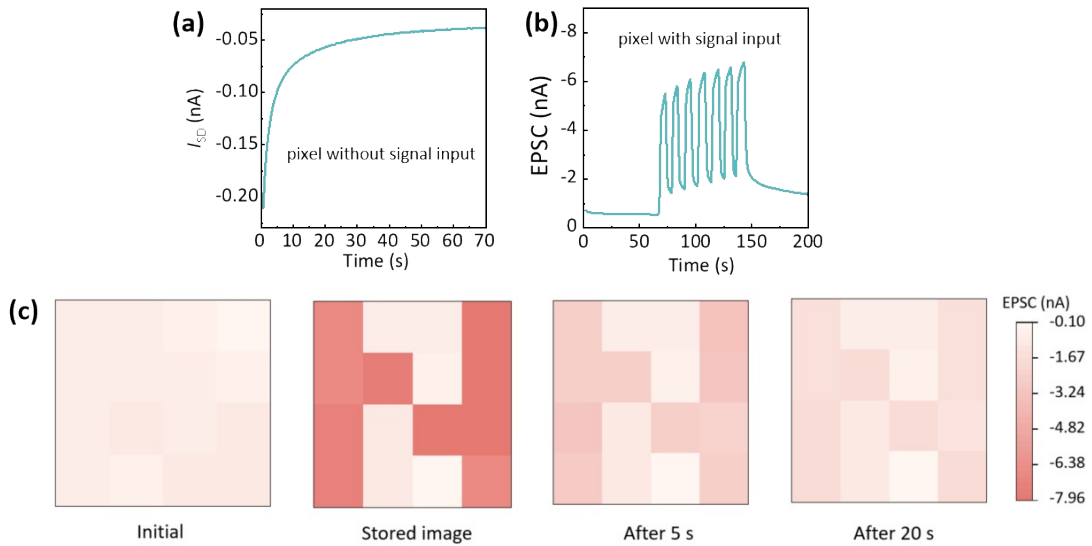

**Figure S10.** (a,b) Drain current of pixels with and without light signal input in our 4×4 stretchable photonic synaptic transistor array, respectively. (c) The final imaging result of the stretchable photonic synaptic transistor array and memorizing effect.
